# Supplementary material for: Correlating drug prescriptions with prognosis in severe COVID-19: first step towards resource management
Source: Springer Nature journal article supplement (doi:10.1186/s12911-022-01983-7), 2022-09-21
Supplement: 12911_2022_1983_MOESM1_ESM.pdf [file 12911_2022_1983_MOESM1_ESM.pdf]

## Supplementary material — Correlating drug prescriptions with prognosis in severe COVID-19: first step towards resource management

Supplementary Table 1: List of drugs prescribed, frequency of prescription, and proportion of patients discharged alive who used the drug.

| <b>Drug prescribed</b>                          | <b>Frequency</b> | <b>Proportion discharged alive (%)</b> |
|-------------------------------------------------|------------------|----------------------------------------|
| anticoagulante                                  | 3445             | 68.27                                  |
| antibiotico                                     | 3300             | 66.39                                  |
| antitermico                                     | 3010             | 64.92                                  |
| omeprazol                                       | 2556             | 61.03                                  |
| sedativo uti                                    | 2002             | 43.21                                  |
| eletrolitos                                     | 1958             | 52.55                                  |
| furosemida                                      | 1916             | 49.63                                  |
| insulina                                        | 1700             | 55.94                                  |
| corticoide iv                                   | 1652             | 50.79                                  |
| droga vasoativa                                 | 1572             | 39.31                                  |
| anti-psicotico                                  | 1458             | 55.01                                  |
| bisacodil                                       | 1360             | 54.71                                  |
| bloqueador neuro-muscular                       | 1278             | 36.46                                  |
| corticoide vo                                   | 1215             | 76.63                                  |
| antiviral                                       | 1160             | 70.0                                   |
| ondansetrona                                    | 849              | 73.85                                  |
| metoclopramida                                  | 819              | 63.49                                  |
| anticonvulsivante                               | 751              | 64.85                                  |
| hidroclorotiazida                               | 739              | 58.05                                  |
| estatina                                        | 728              | 73.08                                  |
| acido acetilsalicilico                          | 660              | 69.39                                  |
| anti-hipertensivo bloqueador de canal de cálcio | 660              | 80.45                                  |
| metadona                                        | 629              | 44.83                                  |
| hemocomponente                                  | 622              | 44.05                                  |
| anti-hipertensivo ieca                          | 519              | 85.36                                  |
| anti-hipertensivo bra                           | 508              | 90.35                                  |
| vitamina                                        | 505              | 67.13                                  |
| atropina                                        | 503              | 48.31                                  |
| salbutamol                                      | 488              | 56.15                                  |
| escopolamina                                    | 447              | 61.07                                  |
| amiodarona                                      | 431              | 31.32                                  |
| dimeticona                                      | 431              | 73.55                                  |
| anti-hipertensivo beta-bloqueador               | 399              | 76.19                                  |
| levotiroxina                                    | 392              | 66.33                                  |
| anti-hipertensivo vasodilatador                 | 352              | 66.48                                  |
| sulfato ferroso                                 | 338              | 93.79                                  |
| tramadol                                        | 333              | 79.58                                  |
| acido folico                                    | 324              | 84.88                                  |
| anti-hipertensivo alfa e beta-bloqueador        | 324              | 82.41                                  |
| ivermectina                                     | 312              | 76.6                                   |
| antifungico                                     | 271              | 47.6                                   |
| espironolactona                                 | 247              | 72.47                                  |
| formoterol+budesonida                           | 247              | 84.21                                  |
| bromoprida                                      | 240              | 55.0                                   |

Supplementary Table 1 continued from previous page

| Drug prescribed                   | Frequency | Proportion discharged alive (%) |
|-----------------------------------|-----------|---------------------------------|
| risperidona                       | 235       | 60.85                           |
| domperidona                       | 226       | 66.81                           |
| glicerofosfato                    | 217       | 44.24                           |
| clopidogrel                       | 206       | 67.96                           |
| zolpidem                          | 184       | 90.22                           |
| sertralina                        | 176       | 85.23                           |
| eritropoietina                    | 174       | 64.37                           |
| ainh                              | 162       | 81.48                           |
| isossorbida                       | 147       | 75.51                           |
| codeina                           | 145       | 85.52                           |
| ipratropio                        | 142       | 71.13                           |
| fenoterol                         | 136       | 65.44                           |
| metformina                        | 128       | 94.53                           |
| complexo b                        | 125       | 81.6                            |
| loratadina                        | 125       | 79.2                            |
| imunossupressor tx                | 124       | 74.19                           |
| amitriptilina                     | 119       | 74.79                           |
| tansulosina                       | 117       | 82.91                           |
| fitomenadiona (vitamina k1)       | 111       | 41.44                           |
| alopurinol                        | 98        | 67.35                           |
| difenidramina                     | 97        | 63.92                           |
| morfina                           | 94        | 60.64                           |
| dimenidrinato                     | 92        | 85.87                           |
| acetilcisteina                    | 91        | 76.92                           |
| sacarato de hidroxido ferrico     | 91        | 72.53                           |
| hidroxido de aluminio             | 89        | 89.89                           |
| haloperidol                       | 84        | 82.14                           |
| ciclobenzaprina                   | 83        | 86.75                           |
| clonidina                         | 83        | 62.65                           |
| hidroxizina                       | 81        | 83.95                           |
| acido tranexamico                 | 77        | 37.66                           |
| glutamina                         | 74        | 78.38                           |
| levomepromazina                   | 70        | 85.71                           |
| fluoxetina                        | 66        | 80.3                            |
| peg                               | 63        | 69.84                           |
| loperamida                        | 57        | 61.4                            |
| albumina                          | 52        | 19.23                           |
| metaraminol                       | 52        | 46.15                           |
| terbutalina                       | 49        | 38.78                           |
| hidroxido aluminio+magnesio       | 48        | 89.58                           |
| tarv                              | 46        | 67.39                           |
| filgrastim                        | 43        | 51.16                           |
| hidroxicloroquina                 | 43        | 88.37                           |
| salmeterol                        | 40        | 72.5                            |
| vitamina a + d                    | 40        | 95.0                            |
| adenosina                         | 39        | 46.15                           |
| deslanosideo                      | 39        | 30.77                           |
| budesonida                        | 37        | 78.38                           |
| naloxona                          | 37        | 29.73                           |
| tiotropio                         | 37        | 86.49                           |
| mirtazapina                       | 36        | 80.56                           |
| gliclazida                        | 34        | 0.0                             |
| trombolítico                      | 34        | 29.41                           |
| olanzapina                        | 32        | 93.75                           |
| sulfato de zinco                  | 31        | 83.87                           |
| anti-hipertensivo alfa bloqueador | 29        | 96.55                           |
| baclofeno                         | 28        | 53.57                           |
| bromazepam                        | 27        | 66.67                           |

Supplementary Table 1 continued from previous page

| Drug prescribed                     | Frequency | Proportion discharged alive (%) |
|-------------------------------------|-----------|---------------------------------|
| escitalopram                        | 27        | 88.89                           |
| finasterida                         | 27        | 81.48                           |
| colchicina                          | 25        | 92.0                            |
| biperideno                          | 23        | 78.26                           |
| levodopa                            | 23        | 52.17                           |
| acido ursodesoxicolico              | 22        | 68.18                           |
| beclometasona                       | 22        | 81.82                           |
| digoxina                            | 20        | 85.0                            |
| cabergolina                         | 18        | 83.33                           |
| hidroxido de magnesio               | 18        | 77.78                           |
| donepezila                          | 17        | 52.94                           |
| pentoxifilina                       | 17        | 5.88                            |
| venlafaxina                         | 17        | 82.35                           |
| acetato de zinco                    | 16        | 93.75                           |
| clortalidona                        | 16        | 93.75                           |
| efedrina                            | 16        | 31.25                           |
| neostigmina                         | 16        | 37.5                            |
| flumazenil                          | 15        | 33.33                           |
| lipase + amilase + protease         | 15        | 80.0                            |
| protamina                           | 15        | 33.33                           |
| calcitriol                          | 14        | 71.43                           |
| desmopressina                       | 14        | 42.86                           |
| hidroxiureia                        | 14        | 64.29                           |
| imunoglobulina humana 5g endovenosa | 14        | 35.71                           |
| imunoglobulina humana anti-rho (d)  | 14        | 0.0                             |
| levetiracetam                       | 12        | 91.67                           |
| milrinona                           | 12        | 16.67                           |
| pamidronato                         | 12        | 25.0                            |
| fenazopiridina                      | 11        | 90.91                           |
| glibenclamida                       | 10        | 90.0                            |
| imunossupressor                     | 10        | 90.0                            |
| ciprofibrato                        | 9         | 88.89                           |
| expectorante hc                     | 8         | 0.0                             |
| formoterol                          | 7         | 85.71                           |
| magnésio                            | 7         | 85.71                           |
| oxido de magnesio                   | 7         | 71.43                           |
| colestiramina                       | 6         | 66.67                           |
| dimendrinato                        | 6         | 83.33                           |
| duloxetina                          | 6         | 83.33                           |
| ezetimibe                           | 6         | 83.33                           |
| imipramina                          | 6         | 66.67                           |
| nortriptilina                       | 6         | 83.33                           |
| piridostigmina                      | 6         | 83.33                           |
| terlipressina                       | 6         | 16.67                           |
| acetazolamida                       | 5         | 0.0                             |
| acido folinico                      | 5         | 80.0                            |
| acido zoledronico                   | 5         | 60.0                            |
| albendazol                          | 5         | 80.0                            |
| carbonato de litio                  | 5         | 0.0                             |
| clorfeniramina                      | 5         | 0.0                             |
| fitomenadiona                       | 5         | 60.0                            |
| metotrexato                         | 5         | 80.0                            |
| octreotida                          | 5         | 60.0                            |
| oxibutiina                          | 5         | 0.0                             |
| propafenona                         | 5         | 80.0                            |
| sildenafil                          | 5         | 80.0                            |
| sugamadex                           | 5         | 20.0                            |
| betaistina                          | 4         | 0.0                             |

Supplementary Table 1 continued from previous page

| Drug prescribed                        | Frequency | Proportion discharged alive (%) |
|----------------------------------------|-----------|---------------------------------|
| cinarizina                             | 4         | 0.0                             |
| glucagon                               | 4         | 75.0                            |
| noretisterona                          | 4         | 75.0                            |
| periciazina                            | 4         | 75.0                            |
| pramipexol                             | 4         | 75.0                            |
| propatilnitrato                        | 4         | 0.0                             |
| tiamazol                               | 4         | 50.0                            |
| tiosulfato de sodio                    | 4         | 75.0                            |
| alfadornase                            | 3         | 0.0                             |
| bupropiona                             | 3         | 0.0                             |
| ciclofosfamida                         | 3         | 0.0                             |
| flunitrazepam                          | 3         | 0.0                             |
| tocilizumabe                           | 3         | 0.0                             |
| tretinoína                             | 3         | 66.67                           |
| acido nicotínico                       | 2         | 50.0                            |
| bromocriptina                          | 2         | 0.0                             |
| diosmina                               | 2         | 0.0                             |
| fibrinogénio                           | 2         | 0.0                             |
| flucitosina                            | 2         | 50.0                            |
| hidroxipropilmetilcelulose             | 2         | 50.0                            |
| leflunomida                            | 2         | 50.0                            |
| mebeverina                             | 2         | 0.0                             |
| medroxiprogesterona                    | 2         | 0.0                             |
| oxicodona                              | 2         | 0.0                             |
| rivastigmina                           | 2         | 50.0                            |
| triancinilona                          | 2         | 0.0                             |
| acitretina                             | 1         | 0.0                             |
| alendronato                            | 1         | 0.0                             |
| azacitina                              | 1         | 0.0                             |
| benznidazol                            | 1         | 0.0                             |
| clomipramina                           | 1         | 0.0                             |
| complexo protrombínico                 | 1         | 0.0                             |
| dapsona                                | 1         | 0.0                             |
| diacereína                             | 1         | 0.0                             |
| doxorubicina                           | 1         | 0.0                             |
| galantamina                            | 1         | 0.0                             |
| imunoglobulina de coelho antitimocitos | 1         | 0.0                             |
| imunoglobulina humana antitetânica     | 1         | 0.0                             |
| leuprorrelina                          | 1         | 0.0                             |
| metilfenidato                          | 1         | 0.0                             |
| montelucaste                           | 1         | 0.0                             |
| orlistate                              | 1         | 0.0                             |
| pirimetamina                           | 1         | 0.0                             |
| primaquina                             | 1         | 0.0                             |
| riluzol                                | 1         | 0.0                             |
| sulfadiazina                           | 1         | 0.0                             |
| talidomida                             | 1         | 0.0                             |
| teofilina                              | 1         | 0.0                             |
| vincristina                            | 1         | 0.0                             |

Supplementary Table 2: Twenty drugs mostly correlated with outcome according to feature selection — age groups and intervals (weeks) since the onset of symptoms

| Drug prescribed | Score       | Week of symptoms | Age group |
|-----------------|-------------|------------------|-----------|
| sedativo uti    | 0,286527894 | 1                | 0 to 50   |
| omeprazol       | 0,276805119 | 1                | 0 to 50   |
| droga vasoativa | 0,271456143 | 1                | 0 to 50   |

Supplementary Table 2 continued from previous page

| Drug prescribed                    | Score        | Week of symptoms | Age group |
|------------------------------------|--------------|------------------|-----------|
| bloqueador neuro-muscular          | 0,255178564  | 1                | 0 to 50   |
| amitriptilina                      | 0,204266008  | 1                | 0 to 50   |
| fitomenadiona (vitamina k1)        | 0,16154288   | 1                | 0 to 50   |
| furosemida                         | 0,147341956  | 1                | 0 to 50   |
| anti-psicotico                     | 0,137122351  | 1                | 0 to 50   |
| eletrolitos                        | 0,1261725    | 1                | 0 to 50   |
| risperidona                        | 0,119617762  | 1                | 0 to 50   |
| imunoglobulina humana anti-rho (d) | -0,050723843 | 1                | 0 to 50   |
| corticoide vo                      | -0,051679233 | 1                | 0 to 50   |
| anti-hipertensivo ieca             | -0,053545712 | 1                | 0 to 50   |
| difenidramina                      | -0,054064975 | 1                | 0 to 50   |
| salbutamol                         | -0,055278999 | 1                | 0 to 50   |
| anticonvulsivante                  | -0,056426876 | 1                | 0 to 50   |
| metoclopramida                     | -0,065774523 | 1                | 0 to 50   |
| sulfato ferroso                    | -0,068190643 | 1                | 0 to 50   |
| acido folico                       | -0,075639533 | 1                | 0 to 50   |
| antibiotico                        | -0,12552167  | 1                | 0 to 50   |
| sedativo uti                       | 0,175200456  | 1                | 0 to 150  |
| droga vasoativa                    | 0,171700467  | 1                | 0 to 150  |
| furosemida                         | 0,155937912  | 1                | 0 to 150  |
| omeprazol                          | 0,145069217  | 1                | 0 to 150  |
| bloqueador neuro-muscular          | 0,133650145  | 1                | 0 to 150  |
| eletrolitos                        | 0,118678572  | 1                | 0 to 150  |
| corticoide iv                      | 0,08976936   | 1                | 0 to 150  |
| antibiotico                        | 0,075861401  | 1                | 0 to 150  |
| amitriptilina                      | 0,06754859   | 1                | 0 to 150  |
| atropina                           | 0,066361749  | 1                | 0 to 150  |
| complexo b                         | -0,036290112 | 1                | 0 to 150  |
| sertralina                         | -0,036663031 | 1                | 0 to 150  |
| formoterol+budesonida              | -0,037642204 | 1                | 0 to 150  |
| zolpidem                           | -0,046983628 | 1                | 0 to 150  |
| imunoglobulina humana anti-rho (d) | -0,047921353 | 1                | 0 to 150  |
| sulfato ferroso                    | -0,049634632 | 1                | 0 to 150  |
| anticoagulante                     | -0,061607432 | 1                | 0 to 150  |
| anti-hipertensivo bra              | -0,07131517  | 1                | 0 to 150  |
| acido folico                       | -0,071666395 | 1                | 0 to 150  |
| hidroclorotiazida                  | -0,071729041 | 1                | 0 to 150  |
| antibiotico                        | 0,2541514    | 1                | 50 to 60  |
| omeprazol                          | 0,220234468  | 1                | 50 to 60  |
| sedativo uti                       | 0,166122699  | 1                | 50 to 60  |
| antifungico                        | 0,144546601  | 1                | 50 to 60  |
| droga vasoativa                    | 0,131640769  | 1                | 50 to 60  |
| bloqueador neuro-muscular          | 0,110459     | 1                | 50 to 60  |
| terbutalina                        | 0,100463657  | 1                | 50 to 60  |
| naloxona                           | 0,100463657  | 1                | 50 to 60  |
| deslanosideo                       | 0,100463657  | 1                | 50 to 60  |
| metotrexato                        | 0,100463657  | 1                | 50 to 60  |
| fluoxetina                         | -0,070766302 | 1                | 50 to 60  |
| tramadol                           | -0,072564232 | 1                | 50 to 60  |
| anti-hipertensivo ieca             | -0,078073472 | 1                | 50 to 60  |
| acido folico                       | -0,081883947 | 1                | 50 to 60  |
| anti-hipertensivo bra              | -0,083590748 | 1                | 50 to 60  |
| vitamina                           | -0,085726457 | 1                | 50 to 60  |
| anticonvulsivante                  | -0,098226119 | 1                | 50 to 60  |
| acido acetilsalicilico             | -0,113321295 | 1                | 50 to 60  |
| levotiroxina                       | -0,114208048 | 1                | 50 to 60  |
| anticoagulante                     | -0,240138381 | 1                | 50 to 60  |
| eletrolitos                        | 0,195136498  | 1                | 60 to 70  |

Supplementary Table 2 continued from previous page

| Drug prescribed                                 | Score        | Week of symptoms | Age group |
|-------------------------------------------------|--------------|------------------|-----------|
| omeprazol                                       | 0,184109174  | 1                | 60 to 70  |
| droga vasoativa                                 | 0,161195063  | 1                | 60 to 70  |
| amiodarona                                      | 0,120145707  | 1                | 60 to 70  |
| atropina                                        | 0,115352226  | 1                | 60 to 70  |
| amitriptilina                                   | 0,112303294  | 1                | 60 to 70  |
| tramadol                                        | 0,096226453  | 1                | 60 to 70  |
| antiviral                                       | 0,095664938  | 1                | 60 to 70  |
| salbutamol                                      | 0,095523725  | 1                | 60 to 70  |
| anti-hipertensivo alfa e beta-bloqueador        | 0,092421825  | 1                | 60 to 70  |
| bromazepam                                      | -0,067737488 | 1                | 60 to 70  |
| dimeticona                                      | -0,068180782 | 1                | 60 to 70  |
| sulfato ferroso                                 | -0,068313824 | 1                | 60 to 70  |
| espironolactona                                 | -0,071510656 | 1                | 60 to 70  |
| eritropoietina                                  | -0,08520969  | 1                | 60 to 70  |
| acido folico                                    | -0,085250927 | 1                | 60 to 70  |
| anti-hipertensivo beta-bloqueador               | -0,088206771 | 1                | 60 to 70  |
| anti-hipertensivo bloqueador de canal de cálcio | -0,092579981 | 1                | 60 to 70  |
| zolpidem                                        | -0,095696155 | 1                | 60 to 70  |
| antitermico                                     | -0,099132894 | 1                | 60 to 70  |
| furosemda                                       | 0,216712625  | 1                | 70 to 110 |
| sedativo uti                                    | 0,211115466  | 1                | 70 to 110 |
| bloqueador neuro-muscular                       | 0,132008399  | 1                | 70 to 110 |
| droga vasoativa                                 | 0,114480412  | 1                | 70 to 110 |
| corticoide iv                                   | 0,106428772  | 1                | 70 to 110 |
| eritropoietina                                  | 0,090154905  | 1                | 70 to 110 |
| hemocomponente                                  | 0,081533975  | 1                | 70 to 110 |
| acido tranexamico                               | 0,072991674  | 1                | 70 to 110 |
| protamina                                       | 0,072727737  | 1                | 70 to 110 |
| levotiroxina                                    | 0,056709648  | 1                | 70 to 110 |
| deslanosideo                                    | -0,063573347 | 1                | 70 to 110 |
| zolpidem                                        | -0,063913491 | 1                | 70 to 110 |
| tiotropio                                       | -0,064211239 | 1                | 70 to 110 |
| dimeticona                                      | -0,064743184 | 1                | 70 to 110 |
| sertralina                                      | -0,0797211   | 1                | 70 to 110 |
| formoterol+budesonida                           | -0,082781961 | 1                | 70 to 110 |
| estatina                                        | -0,097561203 | 1                | 70 to 110 |
| anti-hipertensivo bra                           | -0,146818265 | 1                | 70 to 110 |
| hidroclorotiazida                               | -0,181434705 | 1                | 70 to 110 |
| anticoagulante                                  | -0,200443479 | 1                | 70 to 110 |
| furosemda                                       | 0,298963663  | 2                | 0 to 50   |
| sedativo uti                                    | 0,241562865  | 2                | 0 to 50   |
| droga vasoativa                                 | 0,241537238  | 2                | 0 to 50   |
| hemocomponente                                  | 0,18632762   | 2                | 0 to 50   |
| bloqueador neuro-muscular                       | 0,185709065  | 2                | 0 to 50   |
| fitomenadiona (vitamina k1)                     | 0,149525836  | 2                | 0 to 50   |
| corticoide iv                                   | 0,134658919  | 2                | 0 to 50   |
| eletrolitos                                     | 0,133923512  | 2                | 0 to 50   |
| alopurinol                                      | 0,121909058  | 2                | 0 to 50   |
| sugamadex                                       | 0,120262198  | 2                | 0 to 50   |
| anticoagulante                                  | -0,033227763 | 2                | 0 to 50   |
| antiviral                                       | -0,035003831 | 2                | 0 to 50   |
| dimeticona                                      | -0,035593425 | 2                | 0 to 50   |
| loratadina                                      | -0,037435674 | 2                | 0 to 50   |
| zolpidem                                        | -0,040626096 | 2                | 0 to 50   |
| dimenidrinato                                   | -0,042512166 | 2                | 0 to 50   |
| corticoide vo                                   | -0,044855314 | 2                | 0 to 50   |
| sulfato ferroso                                 | -0,046833345 | 2                | 0 to 50   |
| antitermico                                     | -0,047775865 | 2                | 0 to 50   |

Supplementary Table 2 continued from previous page

| Drug prescribed                                 | Score        | Week of symptoms | Age group |
|-------------------------------------------------|--------------|------------------|-----------|
| ondansetrona                                    | -0,066708318 | 2                | 0 to 50   |
| furosemida                                      | 0,271072362  | 2                | 0 to 150  |
| sedativo uti                                    | 0,257101525  | 2                | 0 to 150  |
| bloqueador neuro-muscular                       | 0,25194672   | 2                | 0 to 150  |
| droga vasoativa                                 | 0,246826621  | 2                | 0 to 150  |
| eletrolitos                                     | 0,215784609  | 2                | 0 to 150  |
| corticoide iv                                   | 0,133215457  | 2                | 0 to 150  |
| hemocomponente                                  | 0,118102663  | 2                | 0 to 150  |
| omeprazol                                       | 0,107807313  | 2                | 0 to 150  |
| albumina                                        | 0,091548913  | 2                | 0 to 150  |
| insulina                                        | 0,084874485  | 2                | 0 to 150  |
| hidroxido aluminio+magnesio                     | -0,036147141 | 2                | 0 to 150  |
| hidroxicloroquina                               | -0,036307984 | 2                | 0 to 150  |
| metformina                                      | -0,03658888  | 2                | 0 to 150  |
| metoclopramida                                  | -0,041131352 | 2                | 0 to 150  |
| ciclobenzaprina                                 | -0,041320607 | 2                | 0 to 150  |
| hidroxido de aluminio                           | -0,048126753 | 2                | 0 to 150  |
| dimenidrinato                                   | -0,050158233 | 2                | 0 to 150  |
| ondansetrona                                    | -0,059571028 | 2                | 0 to 150  |
| ivermectina                                     | -0,065948337 | 2                | 0 to 150  |
| anticoagulante                                  | -0,094396155 | 2                | 0 to 150  |
| eletrolitos                                     | 0,349318089  | 2                | 50 to 60  |
| bloqueador neuro-muscular                       | 0,33068553   | 2                | 50 to 60  |
| sedativo uti                                    | 0,296931301  | 2                | 50 to 60  |
| droga vasoativa                                 | 0,232255022  | 2                | 50 to 60  |
| insulina                                        | 0,228379289  | 2                | 50 to 60  |
| omeprazol                                       | 0,21793625   | 2                | 50 to 60  |
| furosemida                                      | 0,199820942  | 2                | 50 to 60  |
| corticoide iv                                   | 0,17639507   | 2                | 50 to 60  |
| hemocomponente                                  | 0,121617971  | 2                | 50 to 60  |
| glicerofosfato                                  | 0,112800925  | 2                | 50 to 60  |
| anti-hipertensivo bloqueador de canal de cálcio | -0,051866062 | 2                | 50 to 60  |
| anti-hipertensivo vasodilatador                 | -0,054279632 | 2                | 50 to 60  |
| ondansetrona                                    | -0,055601115 | 2                | 50 to 60  |
| dimenidrinato                                   | -0,05825508  | 2                | 50 to 60  |
| acido acetilsalicilico                          | -0,065515156 | 2                | 50 to 60  |
| anticoagulante                                  | -0,075945603 | 2                | 50 to 60  |
| anti-hipertensivo beta-bloqueador               | -0,076635999 | 2                | 50 to 60  |
| difenidramina                                   | -0,078654613 | 2                | 50 to 60  |
| tramadol                                        | -0,08043754  | 2                | 50 to 60  |
| ivermectina                                     | -0,089273929 | 2                | 50 to 60  |
| bloqueador neuro-muscular                       | 0,330999645  | 2                | 60 to 70  |
| furosemida                                      | 0,277026021  | 2                | 60 to 70  |
| droga vasoativa                                 | 0,254926358  | 2                | 60 to 70  |
| eletrolitos                                     | 0,205031648  | 2                | 60 to 70  |
| corticoide iv                                   | 0,170440036  | 2                | 60 to 70  |
| sedativo uti                                    | 0,165703428  | 2                | 60 to 70  |
| hemocomponente                                  | 0,141321394  | 2                | 60 to 70  |
| omeprazol                                       | 0,128239958  | 2                | 60 to 70  |
| albumina                                        | 0,106282789  | 2                | 60 to 70  |
| difenidramina                                   | 0,105102386  | 2                | 60 to 70  |
| tansulosina                                     | -0,053974605 | 2                | 60 to 70  |
| anti-hipertensivo alfa e beta-bloqueador        | -0,056502274 | 2                | 60 to 70  |
| hidroclorotiazida                               | -0,059499128 | 2                | 60 to 70  |
| anticonvulsivante                               | -0,06262383  | 2                | 60 to 70  |
| ondansetrona                                    | -0,064404003 | 2                | 60 to 70  |
| anti-hipertensivo ieca                          | -0,067796864 | 2                | 60 to 70  |
| metoclopramida                                  | -0,069883456 | 2                | 60 to 70  |

Supplementary Table 2 continued from previous page

| Drug prescribed               | Score        | Week of symptoms | Age group |
|-------------------------------|--------------|------------------|-----------|
| domperidona                   | -0,070359754 | 2                | 60 to 70  |
| clopidogrel                   | -0,077996092 | 2                | 60 to 70  |
| anticoagulante                | -0,123833977 | 2                | 60 to 70  |
| sedativo uti                  | 0,303276714  | 2                | 70 to 110 |
| droga vasoativa               | 0,233364805  | 2                | 70 to 110 |
| furosemida                    | 0,217643025  | 2                | 70 to 110 |
| bloqueador neuro-muscular     | 0,190274637  | 2                | 70 to 110 |
| eletrolitos                   | 0,157072806  | 2                | 70 to 110 |
| amiodarona                    | 0,106337918  | 2                | 70 to 110 |
| salbutamol                    | 0,099433457  | 2                | 70 to 110 |
| corticoide iv                 | 0,091651033  | 2                | 70 to 110 |
| albumina                      | 0,084620048  | 2                | 70 to 110 |
| naloxona                      | 0,084453409  | 2                | 70 to 110 |
| hidroxido de aluminio         | -0,047281456 | 2                | 70 to 110 |
| fluoxetina                    | -0,047593661 | 2                | 70 to 110 |
| acetilcisteina                | -0,04766729  | 2                | 70 to 110 |
| complexo b                    | -0,047944562 | 2                | 70 to 110 |
| salmeterol                    | -0,058049518 | 2                | 70 to 110 |
| ciclobenzaprina               | -0,062005184 | 2                | 70 to 110 |
| dimenidrinato                 | -0,062382303 | 2                | 70 to 110 |
| sacarato de hidroxido ferrico | -0,070248778 | 2                | 70 to 110 |
| ivermectina                   | -0,127680282 | 2                | 70 to 110 |
| anticoagulante                | -0,179957837 | 2                | 70 to 110 |
| sedativo uti                  | 0,290932521  | 3                | 0 to 50   |
| bloqueador neuro-muscular     | 0,277879359  | 3                | 0 to 50   |
| omeprazol                     | 0,274380448  | 3                | 0 to 50   |
| hemocomponente                | 0,253015001  | 3                | 0 to 50   |
| eletrolitos                   | 0,245115554  | 3                | 0 to 50   |
| droga vasoativa               | 0,233858091  | 3                | 0 to 50   |
| furosemida                    | 0,211635056  | 3                | 0 to 50   |
| corticoide iv                 | 0,150171536  | 3                | 0 to 50   |
| insulina                      | 0,125060641  | 3                | 0 to 50   |
| pentoxifilina                 | 0,124640652  | 3                | 0 to 50   |
| antiviral                     | -0,039611121 | 3                | 0 to 50   |
| metoclopramida                | -0,044189722 | 3                | 0 to 50   |
| levomepromazina               | -0,046474343 | 3                | 0 to 50   |
| hidroxido de aluminio         | -0,046595777 | 3                | 0 to 50   |
| dimeticona                    | -0,052547694 | 3                | 0 to 50   |
| escopolamina                  | -0,052973627 | 3                | 0 to 50   |
| sertralina                    | -0,054091058 | 3                | 0 to 50   |
| acido folico                  | -0,062097523 | 3                | 0 to 50   |
| sulfato ferroso               | -0,063540068 | 3                | 0 to 50   |
| anticoagulante                | -0,075202001 | 3                | 0 to 50   |
| sedativo uti                  | 0,345100027  | 3                | 0 to 150  |
| bloqueador neuro-muscular     | 0,316971099  | 3                | 0 to 150  |
| droga vasoativa               | 0,263850196  | 3                | 0 to 150  |
| furosemida                    | 0,249343027  | 3                | 0 to 150  |
| eletrolitos                   | 0,237349466  | 3                | 0 to 150  |
| hemocomponente                | 0,166009751  | 3                | 0 to 150  |
| corticoide iv                 | 0,163433994  | 3                | 0 to 150  |
| amiodarona                    | 0,152463823  | 3                | 0 to 150  |
| omeprazol                     | 0,127443742  | 3                | 0 to 150  |
| antitermico                   | 0,112730919  | 3                | 0 to 150  |
| escopolamina                  | -0,04071399  | 3                | 0 to 150  |
| ondansetrona                  | -0,047436747 | 3                | 0 to 150  |
| dimeticona                    | -0,049057253 | 3                | 0 to 150  |
| codeina                       | -0,050759018 | 3                | 0 to 150  |
| corticoide vo                 | -0,053637575 | 3                | 0 to 150  |



Supplementary Table 2 continued from previous page

| Drug prescribed             | Score        | Week of symptoms | Age group |
|-----------------------------|--------------|------------------|-----------|
| hidroxido de aluminio       | -0,054392224 | 3                | 0 to 150  |
| sulfato ferroso             | -0,056080243 | 3                | 0 to 150  |
| anti-hipertensivo bra       | -0,057641775 | 3                | 0 to 150  |
| sertralina                  | -0,069843151 | 3                | 0 to 150  |
| anticoagulante              | -0,218971741 | 3                | 0 to 150  |
| sedativo uti                | 0,435576218  | 3                | 50 to 60  |
| eletrolitos                 | 0,3355547    | 3                | 50 to 60  |
| droga vasoativa             | 0,325176333  | 3                | 50 to 60  |
| bloqueador neuro-muscular   | 0,324685115  | 3                | 50 to 60  |
| antitermico                 | 0,227141423  | 3                | 50 to 60  |
| corticoide iv               | 0,223210323  | 3                | 50 to 60  |
| furosemda                   | 0,217621572  | 3                | 50 to 60  |
| insulina                    | 0,18455582   | 3                | 50 to 60  |
| hemocomponente              | 0,16969203   | 3                | 50 to 60  |
| glicerofosfato              | 0,130908171  | 3                | 50 to 60  |
| dimeticona                  | -0,04225192  | 3                | 50 to 60  |
| espironolactona             | -0,04225192  | 3                | 50 to 60  |
| hidroxido aluminio+magnesio | -0,050384376 | 3                | 50 to 60  |
| dimenidrinato               | -0,050509442 | 3                | 50 to 60  |
| metoclopramida              | -0,054903412 | 3                | 50 to 60  |
| sertralina                  | -0,067015058 | 3                | 50 to 60  |
| anti-hipertensivo bra       | -0,067596843 | 3                | 50 to 60  |
| anti-hipertensivo ieca      | -0,074640801 | 3                | 50 to 60  |
| corticoide vo               | -0,114035885 | 3                | 50 to 60  |
| anticoagulante              | -0,227355325 | 3                | 50 to 60  |
| sedativo uti                | 0,432383936  | 3                | 60 to 70  |
| bloqueador neuro-muscular   | 0,329907848  | 3                | 60 to 70  |
| droga vasoativa             | 0,31870765   | 3                | 60 to 70  |
| eletrolitos                 | 0,292068386  | 3                | 60 to 70  |
| furosemda                   | 0,225381049  | 3                | 60 to 70  |
| corticoide iv               | 0,207043325  | 3                | 60 to 70  |
| hemocomponente              | 0,147050692  | 3                | 60 to 70  |
| amiodarona                  | 0,145941138  | 3                | 60 to 70  |
| omeprazol                   | 0,135598169  | 3                | 60 to 70  |
| bisacodil                   | 0,121792996  | 3                | 60 to 70  |
| fenoterol                   | -0,056410237 | 3                | 60 to 70  |
| clonidina                   | -0,056410237 | 3                | 60 to 70  |
| gliclazida                  | -0,056656609 | 3                | 60 to 70  |
| escopolamina                | -0,05672934  | 3                | 60 to 70  |
| zolpidem                    | -0,057497771 | 3                | 60 to 70  |
| loratadina                  | -0,064856142 | 3                | 60 to 70  |
| codeina                     | -0,065249694 | 3                | 60 to 70  |
| anti-hipertensivo bra       | -0,068404557 | 3                | 60 to 70  |
| sertralina                  | -0,081497948 | 3                | 60 to 70  |
| anticoagulante              | -0,115662986 | 3                | 60 to 70  |
| bloqueador neuro-muscular   | 0,299954594  | 3                | 70 to 110 |
| furosemda                   | 0,287854291  | 3                | 70 to 110 |
| sedativo uti                | 0,27909869   | 3                | 70 to 110 |
| droga vasoativa             | 0,23445391   | 3                | 70 to 110 |
| amiodarona                  | 0,155768077  | 3                | 70 to 110 |
| hemocomponente              | 0,154946398  | 3                | 70 to 110 |
| eletrolitos                 | 0,133191941  | 3                | 70 to 110 |
| corticoide iv               | 0,128682287  | 3                | 70 to 110 |
| antibiotico                 | 0,107640326  | 3                | 70 to 110 |
| antitermico                 | 0,09339859   | 3                | 70 to 110 |
| acido acetilsalicilico      | -0,061557248 | 3                | 70 to 110 |
| hidroxido de aluminio       | -0,064989249 | 3                | 70 to 110 |
| ciprofibrato                | -0,064989249 | 3                | 70 to 110 |

Supplementary Table 2 continued from previous page

| Drug prescribed                                 | Score        | Week of symptoms | Age group |
|-------------------------------------------------|--------------|------------------|-----------|
| tansulosina                                     | -0,067570854 | 3                | 70 to 110 |
| ivermectina                                     | -0,072028074 | 3                | 70 to 110 |
| espirolactona                                   | -0,07458312  | 3                | 70 to 110 |
| anti-hipertensivo bra                           | -0,084168765 | 3                | 70 to 110 |
| estatina                                        | -0,101316539 | 3                | 70 to 110 |
| anti-hipertensivo bloqueador de canal de cálcio | -0,117733215 | 3                | 70 to 110 |
| anticoagulante                                  | -0,347692031 | 3                | 70 to 110 |
| eletrolitos                                     | 0,342735032  | 4                | 0 to 50   |
| sedativo uti                                    | 0,335196672  | 4                | 0 to 50   |
| droga vasoativa                                 | 0,323957426  | 4                | 0 to 50   |
| corticoide iv                                   | 0,293458703  | 4                | 0 to 50   |
| bloqueador neuro-muscular                       | 0,282490468  | 4                | 0 to 50   |
| metadona                                        | 0,259558969  | 4                | 0 to 50   |
| omeprazol                                       | 0,236434905  | 4                | 0 to 50   |
| furosemida                                      | 0,194143465  | 4                | 0 to 50   |
| hemocomponente                                  | 0,162375517  | 4                | 0 to 50   |
| difenidramina                                   | 0,154692863  | 4                | 0 to 50   |
| hidroxizina                                     | -0,057430559 | 4                | 0 to 50   |
| sulfato de zinco                                | -0,057563601 | 4                | 0 to 50   |
| ciclobenzaprina                                 | -0,063901672 | 4                | 0 to 50   |
| vitamina                                        | -0,064757613 | 4                | 0 to 50   |
| antibiotico                                     | -0,065569528 | 4                | 0 to 50   |
| sulfato ferroso                                 | -0,070218969 | 4                | 0 to 50   |
| zolpidem                                        | -0,085352738 | 4                | 0 to 50   |
| anticonvulsivante                               | -0,088090512 | 4                | 0 to 50   |
| anticoagulante                                  | -0,096660286 | 4                | 0 to 50   |
| corticoide vo                                   | -0,112766581 | 4                | 0 to 50   |
| eletrolitos                                     | 0,321262052  | 4                | 0 to 150  |
| bloqueador neuro-muscular                       | 0,313161431  | 4                | 0 to 150  |
| droga vasoativa                                 | 0,312422726  | 4                | 0 to 150  |
| sedativo uti                                    | 0,2874752    | 4                | 0 to 150  |
| omeprazol                                       | 0,239591242  | 4                | 0 to 150  |
| furosemida                                      | 0,234744803  | 4                | 0 to 150  |
| corticoide iv                                   | 0,205677897  | 4                | 0 to 150  |
| hemocomponente                                  | 0,18579915   | 4                | 0 to 150  |
| insulina                                        | 0,158042526  | 4                | 0 to 150  |
| amiodarona                                      | 0,132870871  | 4                | 0 to 150  |
| sertralina                                      | -0,054761811 | 4                | 0 to 150  |
| hidroxizina                                     | -0,056813186 | 4                | 0 to 150  |
| tramadol                                        | -0,05848687  | 4                | 0 to 150  |
| sulfato ferroso                                 | -0,063184064 | 4                | 0 to 150  |
| corticoide vo                                   | -0,064305855 | 4                | 0 to 150  |
| hidroxido de aluminio                           | -0,067517726 | 4                | 0 to 150  |
| anticonvulsivante                               | -0,068995474 | 4                | 0 to 150  |
| anti-hipertensivo bra                           | -0,079199097 | 4                | 0 to 150  |
| zolpidem                                        | -0,101355433 | 4                | 0 to 150  |
| anticoagulante                                  | -0,201570944 | 4                | 0 to 150  |
| bloqueador neuro-muscular                       | 0,447876637  | 4                | 50 to 60  |
| droga vasoativa                                 | 0,433646964  | 4                | 50 to 60  |
| hemocomponente                                  | 0,31904573   | 4                | 50 to 60  |
| eletrolitos                                     | 0,298494784  | 4                | 50 to 60  |
| antibiotico                                     | 0,230259404  | 4                | 50 to 60  |
| amiodarona                                      | 0,199484354  | 4                | 50 to 60  |
| furosemida                                      | 0,193207964  | 4                | 50 to 60  |
| anti-psicotico                                  | 0,181034401  | 4                | 50 to 60  |
| insulina                                        | 0,166317511  | 4                | 50 to 60  |
| atropina                                        | 0,166315077  | 4                | 50 to 60  |
| anti-hipertensivo bra                           | -0,060522753 | 4                | 50 to 60  |

Supplementary Table 2 continued from previous page

| Drug prescribed                          | Score        | Week of symptoms | Age group |
|------------------------------------------|--------------|------------------|-----------|
| estatina                                 | -0,06068008  | 4                | 50 to 60  |
| dimeticona                               | -0,060751881 | 4                | 50 to 60  |
| ivermectina                              | -0,062429149 | 4                | 50 to 60  |
| sacarato de hidroxido ferrico            | -0,069094128 | 4                | 50 to 60  |
| hidroxido de aluminio                    | -0,078629955 | 4                | 50 to 60  |
| metformina                               | -0,081516623 | 4                | 50 to 60  |
| zolpidem                                 | -0,08987119  | 4                | 50 to 60  |
| tramadol                                 | -0,091032748 | 4                | 50 to 60  |
| anticoagulante                           | -0,148963506 | 4                | 50 to 60  |
| eletrolitos                              | 0,387459796  | 4                | 60 to 70  |
| bloqueador neuro-muscular                | 0,366334212  | 4                | 60 to 70  |
| omeprazol                                | 0,330900303  | 4                | 60 to 70  |
| droga vasoativa                          | 0,271479525  | 4                | 60 to 70  |
| furosemda                                | 0,241315657  | 4                | 60 to 70  |
| corticoide iv                            | 0,209083349  | 4                | 60 to 70  |
| hemocomponente                           | 0,187948957  | 4                | 60 to 70  |
| insulina                                 | 0,150922081  | 4                | 60 to 70  |
| antitermico                              | 0,140705294  | 4                | 60 to 70  |
| glicerofosfato                           | 0,132445006  | 4                | 60 to 70  |
| codeina                                  | -0,067636649 | 4                | 60 to 70  |
| hidroxido de aluminio                    | -0,075742328 | 4                | 60 to 70  |
| amitriptilina                            | -0,076595494 | 4                | 60 to 70  |
| corticoide vo                            | -0,077696451 | 4                | 60 to 70  |
| sertralina                               | -0,077705273 | 4                | 60 to 70  |
| escopolamina                             | -0,092848707 | 4                | 60 to 70  |
| anti-hipertensivo bra                    | -0,096109187 | 4                | 60 to 70  |
| tramadol                                 | -0,114650378 | 4                | 60 to 70  |
| zolpidem                                 | -0,115632869 | 4                | 60 to 70  |
| anticoagulante                           | -0,271695871 | 4                | 60 to 70  |
| sedativo uti                             | 0,594225655  | 4                | 70 to 110 |
| droga vasoativa                          | 0,291134654  | 4                | 70 to 110 |
| furosemda                                | 0,264000336  | 4                | 70 to 110 |
| omeprazol                                | 0,258383731  | 4                | 70 to 110 |
| eletrolitos                              | 0,23812814   | 4                | 70 to 110 |
| corticoide iv                            | 0,22130632   | 4                | 70 to 110 |
| bloqueador neuro-muscular                | 0,216535998  | 4                | 70 to 110 |
| insulina                                 | 0,150687068  | 4                | 70 to 110 |
| hemocomponente                           | 0,146577217  | 4                | 70 to 110 |
| antitermico                              | 0,129213993  | 4                | 70 to 110 |
| espironolactona                          | -0,06879244  | 4                | 70 to 110 |
| anti-hipertensivo alfa e beta-bloqueador | -0,073861306 | 4                | 70 to 110 |
| corticoide vo                            | -0,081964566 | 4                | 70 to 110 |
| metformina                               | -0,082037185 | 4                | 70 to 110 |
| tansulosina                              | -0,084607223 | 4                | 70 to 110 |
| zolpidem                                 | -0,095175922 | 4                | 70 to 110 |
| ivermectina                              | -0,095987169 | 4                | 70 to 110 |
| estatina                                 | -0,132852493 | 4                | 70 to 110 |
| anti-hipertensivo bra                    | -0,137785267 | 4                | 70 to 110 |
| anticoagulante                           | -0,285345054 | 4                | 70 to 110 |
| furosemda                                | 0,319689616  | all weeks        | 0 to 150  |
| sedativo uti                             | 0,293000891  | all weeks        | 0 to 150  |
| bloqueador neuro-muscular                | 0,283575746  | all weeks        | 0 to 150  |
| eletrolitos                              | 0,224338292  | all weeks        | 0 to 150  |
| corticoide iv                            | 0,198240259  | all weeks        | 0 to 150  |
| droga vasoativa                          | 0,181710551  | all weeks        | 0 to 150  |
| amiodarona                               | 0,152031836  | all weeks        | 0 to 150  |
| hemocomponente                           | 0,145462487  | all weeks        | 0 to 150  |
| omeprazol                                | 0,132579493  | all weeks        | 0 to 150  |

Supplementary Table 2 continued from previous page

| Drug prescribed                     | Score        | Week of symptoms | Age group |
|-------------------------------------|--------------|------------------|-----------|
| anti-psicotico                      | 0,129309845  | all weeks        | 0 to 150  |
| cabergolina                         | -0,035717099 | all weeks        | 0 to 150  |
| metformina                          | -0,037816969 | all weeks        | 0 to 150  |
| ondansetrone                        | -0,037995413 | all weeks        | 0 to 150  |
| hidroxizina                         | -0,03857003  | all weeks        | 0 to 150  |
| hidroxido aluminio+magnesio         | -0,040001253 | all weeks        | 0 to 150  |
| immunoglobulina humana anti-rho (d) | -0,042250015 | all weeks        | 0 to 150  |
| ivermectina                         | -0,046706539 | all weeks        | 0 to 150  |
| dimenidrinato                       | -0,04727198  | all weeks        | 0 to 150  |
| zolpidem                            | -0,051560888 | all weeks        | 0 to 150  |
| hidroxido de aluminio               | -0,063728064 | all weeks        | 0 to 150  |
